# Supplementary material
Source: Research Square preprint supplement (doi:10.21203/rs.3.rs-8940688/v1)
Supplement: Supplementary file 1 [file f43c0efbc3b8116294366099.docx]

STUDY PROTOCOL

Title:

Skin brightening following combined topical Lactobacillus-derived Extracellular Vesicles and Cold Atmospheric Plasma: A Prospective Clinical Study

1. Background and Rationale

Uneven pigmentation and dullness are common features of facial ageing. Emerging therapies such as extracellular vesicles and cold atmospheric plasma offer potential synergistic effects for improving skin brightness and quality. This study was designed to evaluate the safety and effectiveness of a combined treatment protocol.

2. Study Design

This is a prospective, single-centre clinical study evaluating a combined topical and device-based intervention for facial skin brightening.

3. Participants

Inclusion Criteria:

- Adults aged 25–60 years

- Mild to moderate photoageing

- Complaints of dullness and uneven skin tone

Exclusion Criteria:

- Active skin infection or inflammatory dermatoses

- History of keloid scarring

- Recent laser or chemical peel (<6 months)

- Recent filler or botulinum toxin (<6 months)

- Pregnancy or breastfeeding

- Systemic retinoid use (<6 months)

4. Intervention

Each participant received four treatment sessions at 2-week intervals:

- Application of 3 mL Lactobacillus-derived extracellular vesicle serum (EXXO)

- Followed by cold atmospheric plasma treatment (PURISMA)

Treatment duration per session: approximately 7–10 minutes.

5. Outcome Measures

Primary Outcome:

- Global Aesthetic Improvement Scale (GAIS) at 12 weeks

Secondary Outcomes:

- Patient self-assessment of brightness and satisfaction

- Safety outcomes (erythema, oedema, adverse events)

6. Assessments

- Standardised VISIA imaging at baseline and week 12

- Blinded evaluation by two dermatologists

- Patient-reported outcomes collected at week 12

7. Safety Monitoring

Adverse events including erythema, oedema, infection, and pigmentary changes were recorded at each visit and follow-up.

8. Statistical Analysis

This study used descriptive statistical analysis. Results are reported as means, standard deviations, and percentages.

9. Ethics

The study was approved by the Korea National Institute for Bioethics Policy Institutional Review Board (Approval No. P01-202511-01-033). All participants provided written informed consent.

10. Registration

This study was conducted as a non-interventional cosmetic clinical study; therefore, formal clinical trial registration was not required.
